# Supplementary material for: Improvement in sleep duration was associated with higher cognitive function: a new association
Source: publisher site journal article supplement (doi:10.18632/aging.103948), 2020-10-20
Supplement: Supplementary file [file aging-v12i20-103948-supplementary-material-SD1.pdf]

## SUPPLEMENTARY FIGURES

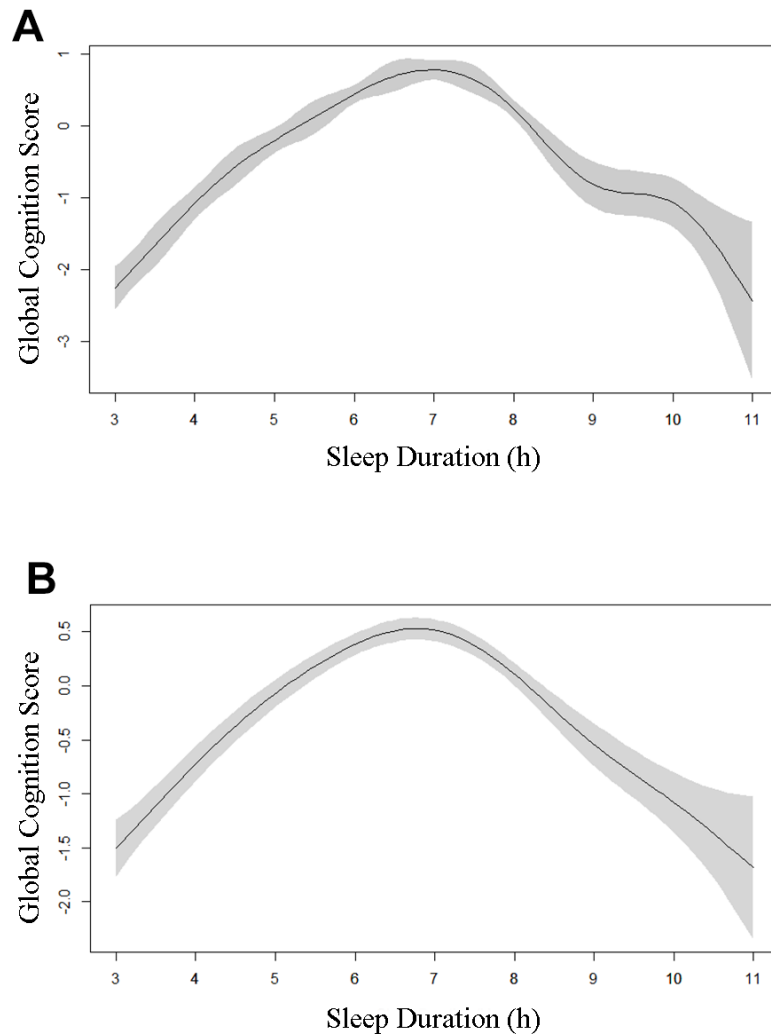

**Supplementary Figure 1. Plots of the estimated smooth function of sleep duration in Wave 1 with 95% confidence intervals for the GAM when the response variable was global cognition in Wave 1. (A) Model 0 showed a univariate smooth function of sleep duration (EDF = 7.44,  $P < 0.001$ ). (B) Model 1 presented a multivariable smooth function of sleep duration, adjusted for age and sex (EDF = 4.74,  $P < 0.001$ ).**

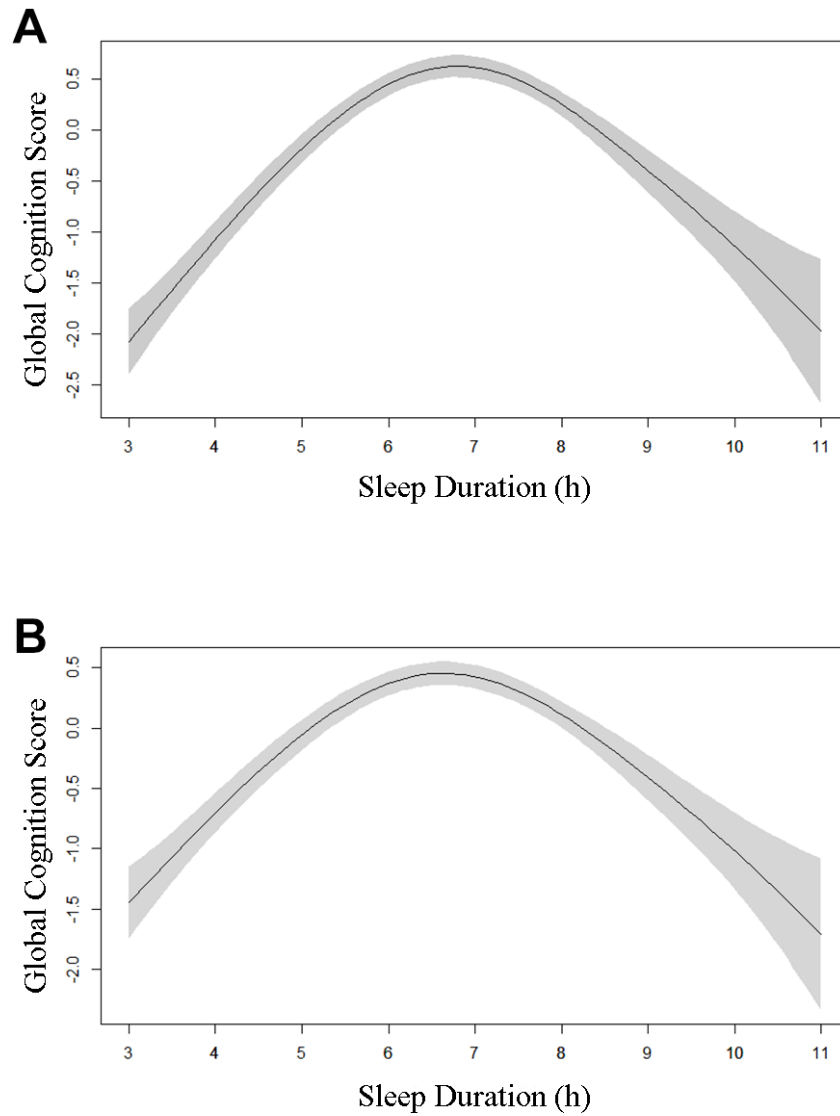

**Supplementary Figure 2. Plots of estimated smooth function of sleep duration in Wave 1 with 95% confidence intervals for the GAM when the response variable was global cognition in Wave 3. (A) Model 0 showed a univariate smooth function of sleep duration (EDF = 3.71,  $P < 0.001$ ). (B) Model 1 presented a multivariable smooth function of sleep duration, adjusted for age and sex (EDF = 4.58,  $P < 0.001$ ).**

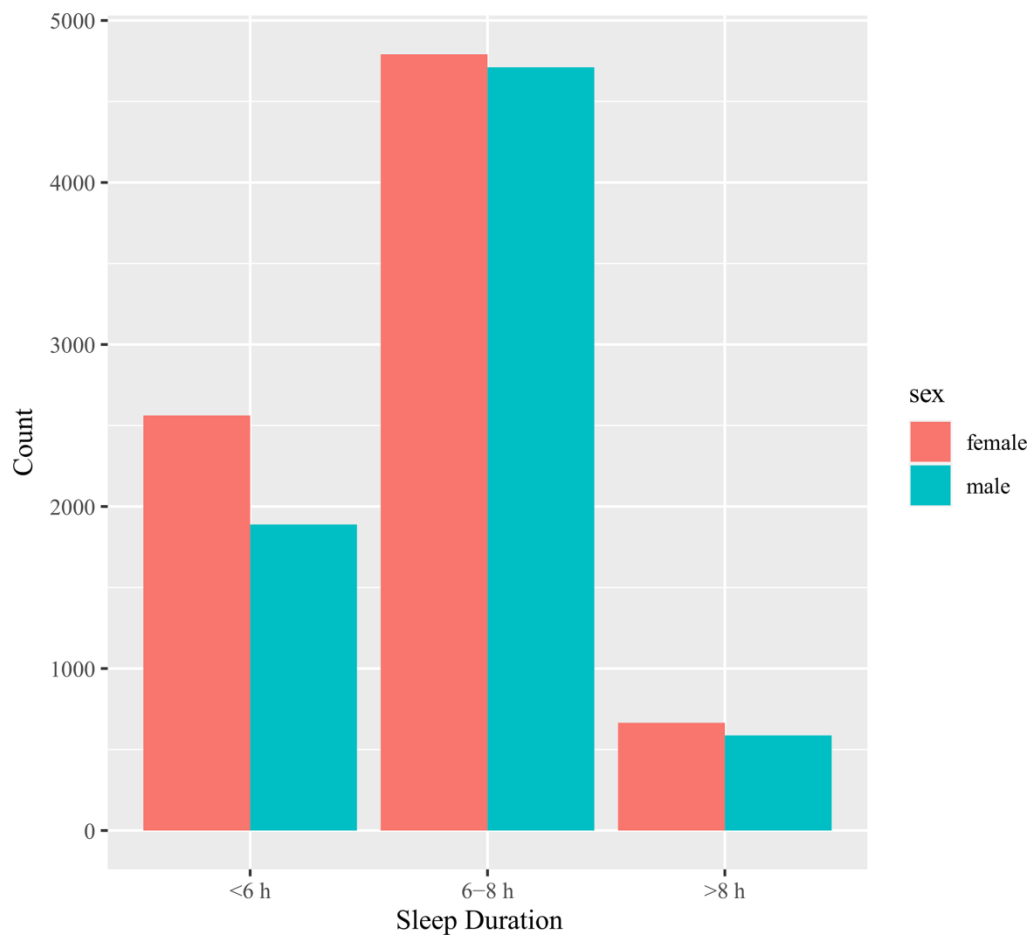

**Supplementary Figure 3. Sex differences in sleep duration in Wave 1.**
